# Supplementary material for: HIV-1 CCR5 gene therapy will fail unless it is combined with a suicide gene
Source: PubMed Central journal article supplement (PMC4682191; doi:10.1038/srep18088), 2015-12-17
Supplement: srep18088-s1.pdf [file srep18088-s1.pdf]

# HIV-1 CCR5 gene therapy will fail unless it is combined with a suicide gene

Aridaman Pandit<sup>1</sup> and Rob J de Boer<sup>1</sup>

<sup>1</sup>Theoretical Biology and Bioinformatics, Utrecht University, Utrecht, The Netherlands

## Supplementary Information

**Table S1.** A summary of the viral load observed in the study of Tebas et al.<sup>1</sup>

| Patient | Set-point VL (log <sub>10</sub> copies/ml) | VL after gene therapy (log <sub>10</sub> copies/ml) | Comments                                |
|---------|--------------------------------------------|-----------------------------------------------------|-----------------------------------------|
| 201     | 3.27                                       | 3.99                                                | Moderate increase                       |
| 203     | 4.08                                       | 3.92                                                | Mild decrease                           |
| 204     | 4.73                                       | 4.78                                                | ART re-initiated because of high VL     |
| 205     | 5.21                                       | 1.53                                                | Individual was heterozygous for CCR5Δ32 |
| 251     | 4.72                                       | 5.22                                                | ART re-initiated because of high VL     |
| 253     | 4.16                                       | 4.11                                                | Mild decrease                           |

The patients shown here underwent a 12-week interruption to ART, 4 weeks after receiving the gene therapy. A marked decline of the viral load was only observed in patient 205, who was later discovered to be heterozygous for CCR5Δ32.<sup>1</sup> Thus, the gene therapy potentially resulted in homozygous CCR5 disruption in modified CD4+ T cells, indicating that complete disruption of CCR5 gene can drastically decrease the viral load. In the other five patients the viral load went up (3/5) or mildly down (2/5). The viral load values were obtained using WebPlotDigitizer (<http://arohatgi.info/WebPlotDigitizer>) from data given in Tebas et al.<sup>1</sup>

## References

1. Tebas, P. *et al.* Gene editing of CCR5 in autologous CD4 T cells of persons infected with HIV. *New England Journal of Medicine* **370**, 901–910 (2014).

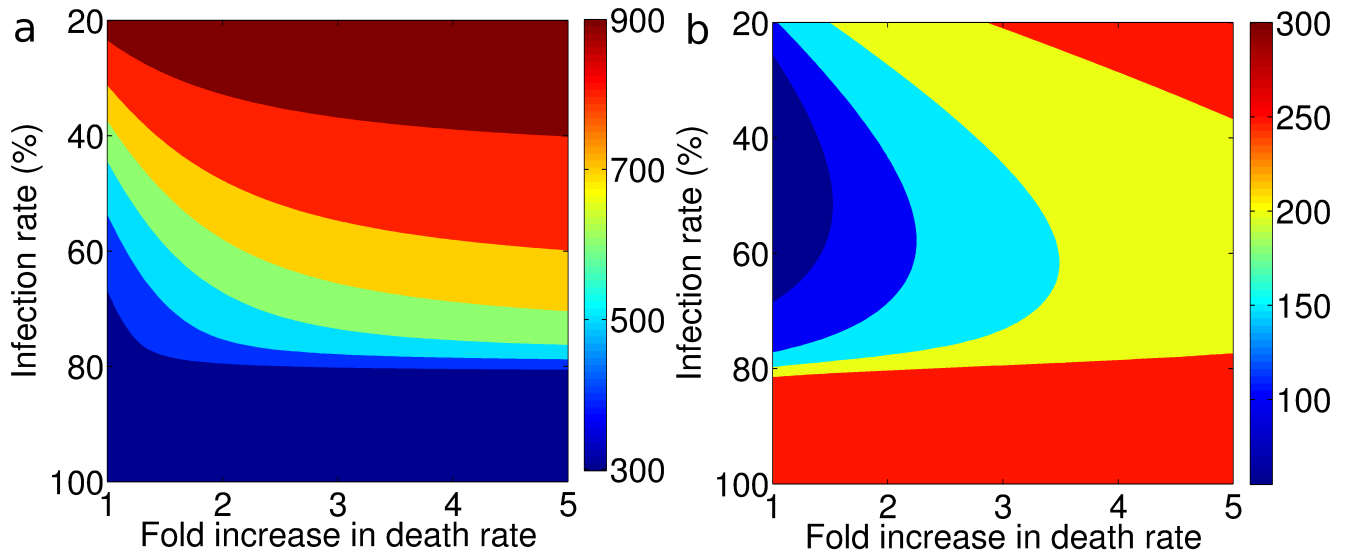

**Figure S1.** The effect of decreasing the infection rate ( $\beta_g$ ) and increasing the death rate ( $\delta_g$ ) of genetically modified cells on the steady state: (a) total CD4+ T cell count ( $\overline{T}_n + \overline{T}_g$ ), and (b) normal CD4+ T cell count ( $\overline{T}_n$ ). The colors indicate steady state T cell counts, (a)  $\overline{T}_n + \overline{T}_g$  or (b)  $\overline{T}_n$ , for the same parameter values as considered in Figure 2a. A decrease in  $\beta_g$  can decrease the counts and hence the diversity of the normal T cells,  $T_n$  (Panel b). A concomitant increase in  $\delta_g$  retains the counts (and hence the diversity) of the  $T_n$  cells much better (Panel b).

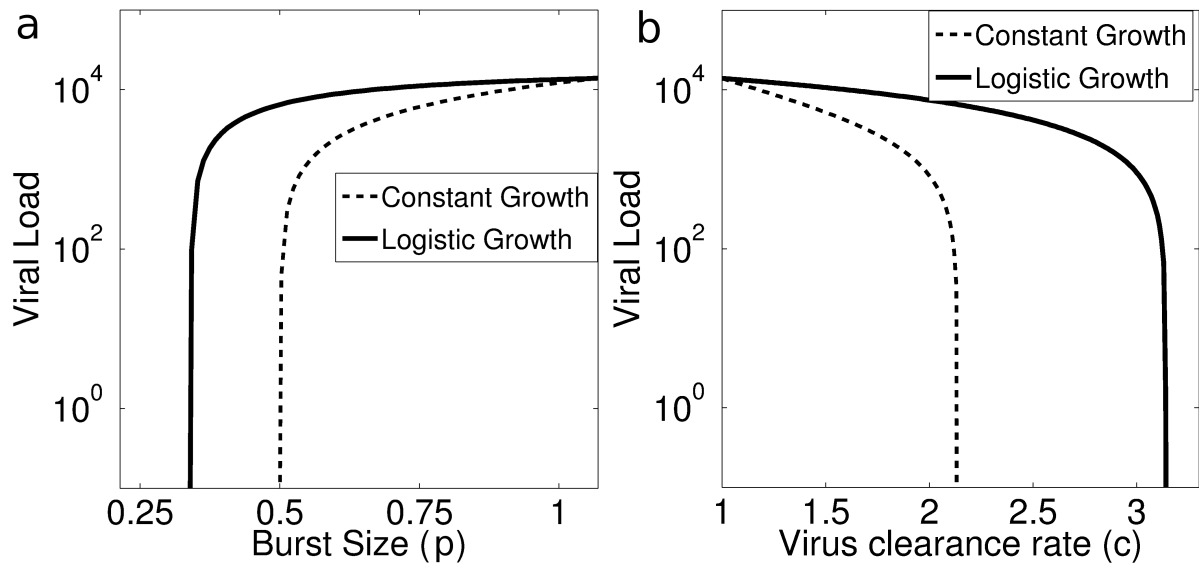

**Figure S2.** The effect of changing (a) the burst size,  $p$ , and (b) the virus clearance rate,  $c$ , on viral load in the typical HIV model (Eqs. 1-3).

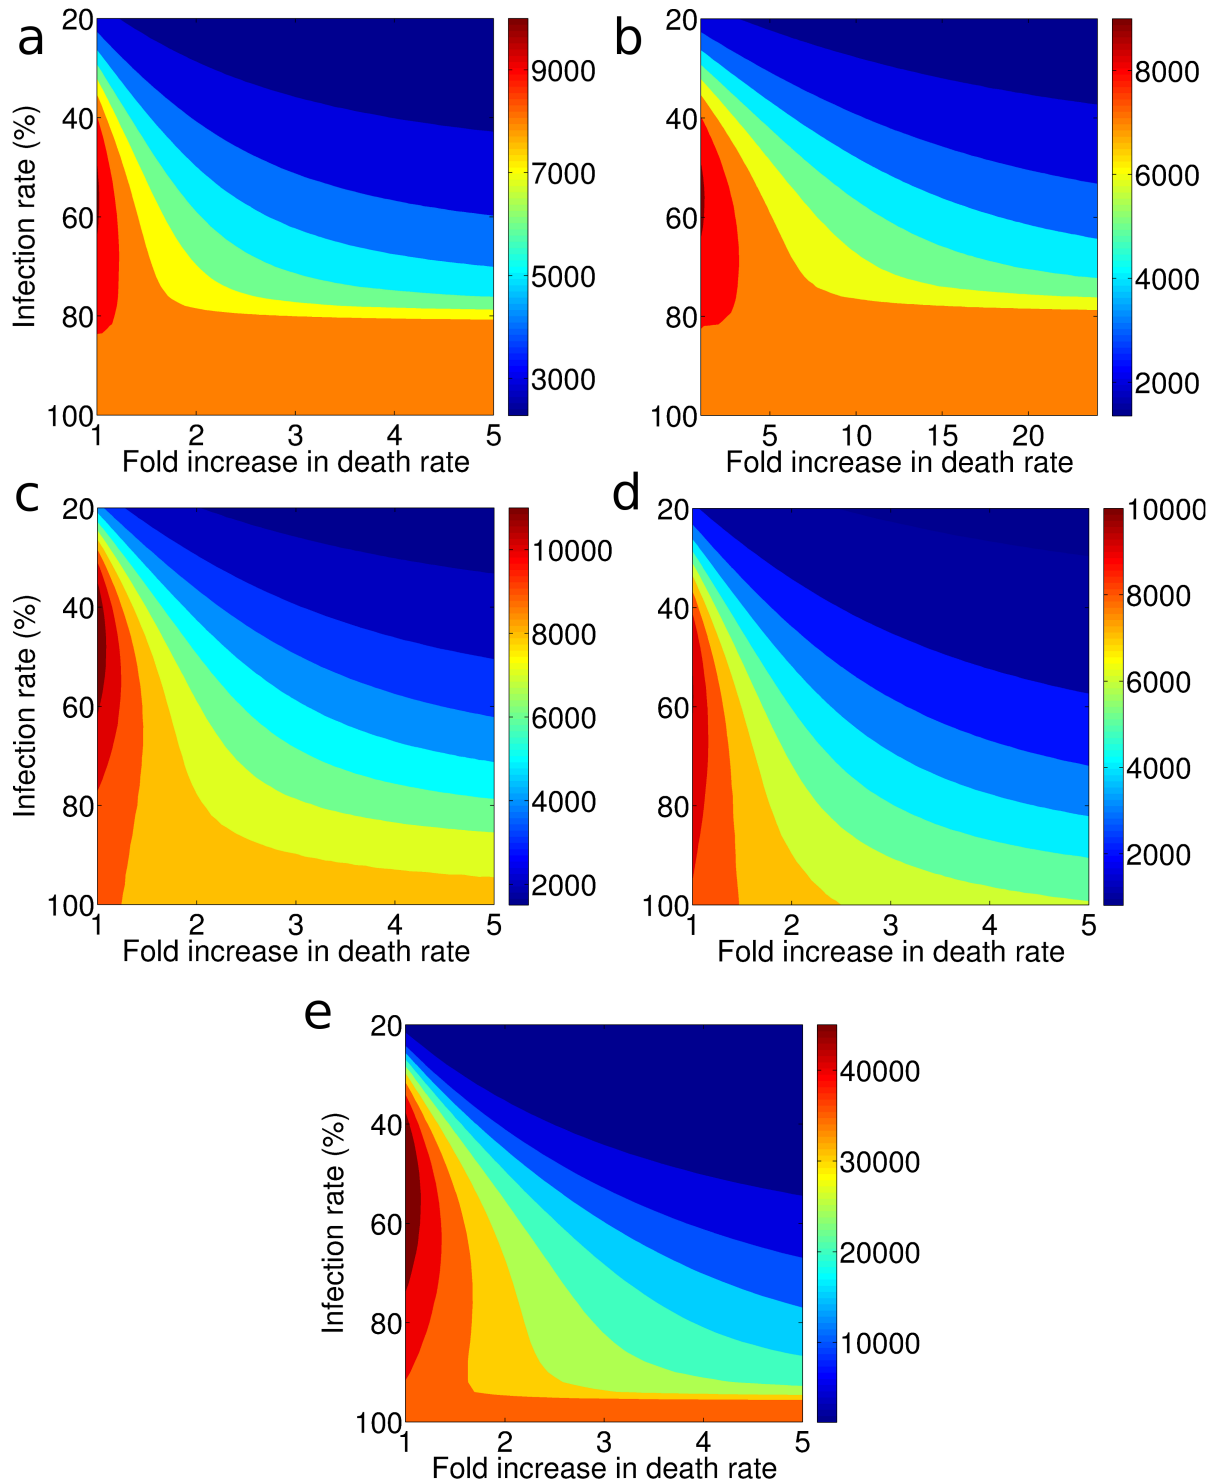

**Figure S3.** The effect of decreasing the infection rate ( $\beta_g$ ) and increasing the death rate ( $\delta_g$ ) of genetically modified cells in: (a) the *Latent model* (Eqs. 6, 7, 10-14); (b) the *CTL model* (Eqs. 6, 7, 10, 15, and 16); (c) the model considering 25% hematopoietic stem cells to be genetically modified ( $\lambda_2 = 0.33\lambda_1$ ); (d) the model considering 50% hematopoietic stem cells to be genetically modified ( $\lambda_2 = \lambda_1$  in Eqs. 6, 8-10, and 20); and (e) the model considering different stages of infected cells described in Methods (Eqs. 21-33).

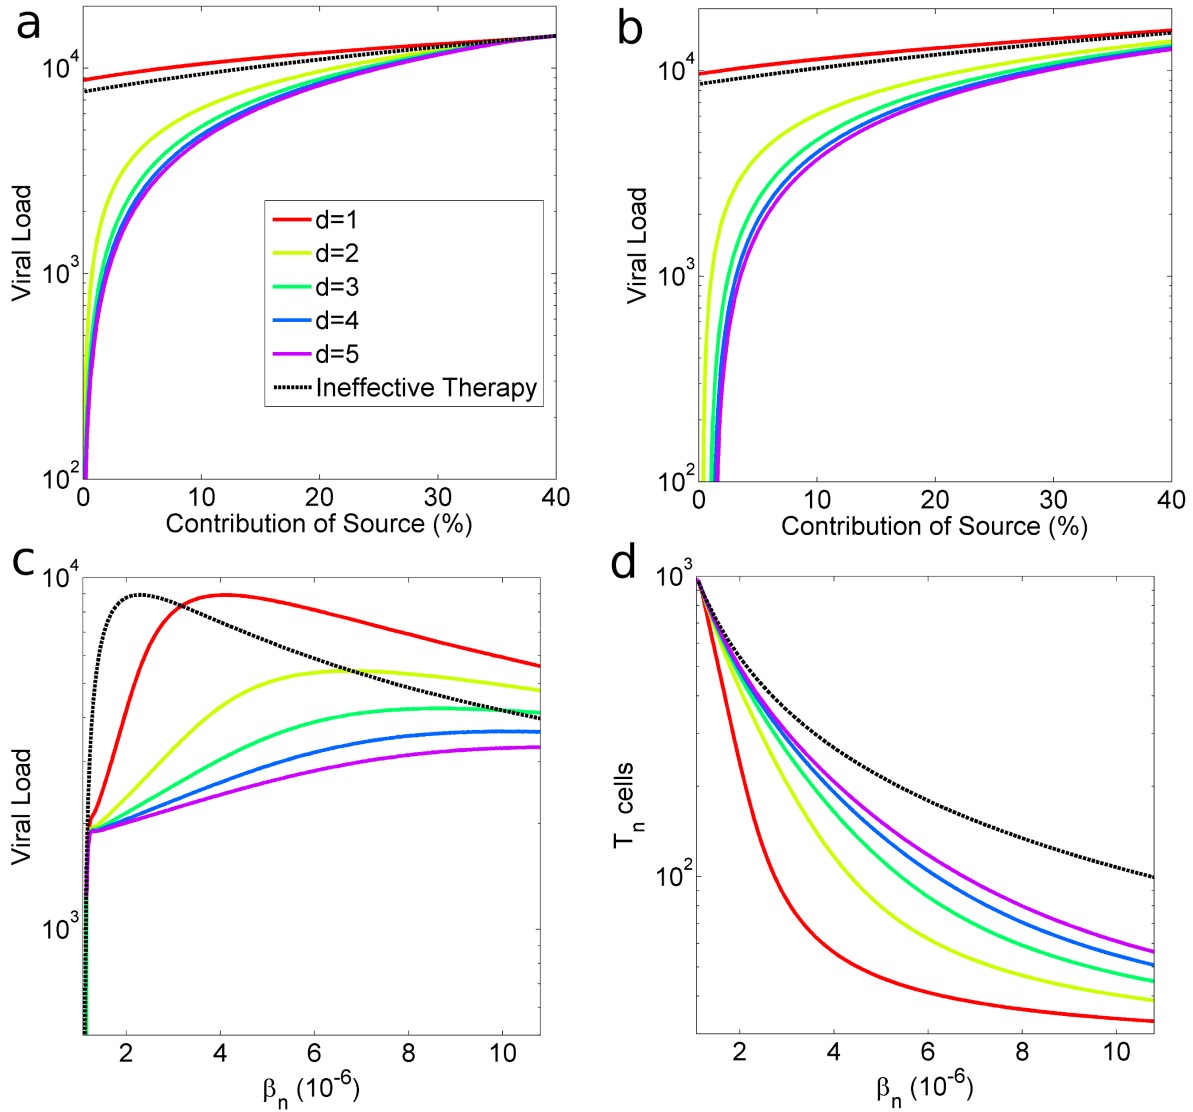

**Figure S4.** Parameter sensitivity analysis. In Figure 2, we considered the case where 5% of the normal uninfected T cells ( $T_n$ ) come from the source (naive T cells) and 95% of the  $T_n$  cells are formed via self-renewal (i.e.  $\lambda = 1$  cells  $\mu l^{-1}$  day $^{-1}$ ,  $r = 0.057$  and  $K = 1500$  in Eq. 1). Here we study the effect of the contribution from the source on a CCR5 suicide gene therapy. We performed a parameter sensitivity analysis considering  $r = 0.06$  and  $\bar{T}_n = 1000$  (Fig. 1) for the virus free steady state, and varied  $\lambda$  and  $K$  solving  $K$  from  $K = r\bar{T}_n^2 / (\lambda + (r - \delta_T)\bar{T}_n)$  (derived from Eq. 1). In panel (a) we show the effect of the relative contribution from the source for  $T_n$  cells with a heterozygous CCR5 disruption (i.e.  $\beta_g = 0.5\beta_n$ ) considering normal gene therapy i.e. 0% contribution from the source for  $T_g$  cells. In panel (b) we repeat the analysis considering a stem cell based gene therapy i.e. 5% contribution from the source for  $T_g$  cells. In panels (c) and (d) we perform a similar parameter sensitivity analysis by varying the rate of infection of the unmodified T cell  $\beta_n$ , setting other parameters the same as Fig. 2. In panel (c) we show that for large range of  $\beta_n$  values a suicide gene always results in a reduction of the virus load compared to the current CCR5 gene therapy (red line). In panel (d) we show that an increase in  $\beta_n$  results in a decrease of the  $T_n$  cells. Since we are simulating the chronic stage of HIV-1 infected individuals, we consider normal T cell counts of about 300 cells  $\mu l^{-1}$ . For high rates of infection ( $\beta_n \geq 5.4 \times 10^{-6}$ ),  $T_n$  is less than 200 cells  $\mu l^{-1}$  which is too low for a normal chronic stage, as one expects AIDS to develop. Nevertheless, a suicide gene would always improve the normal T cell count compared to the current CCR5 gene therapy (red line).
